# Supplementary material for: Highly efficient 5' capping of mitochondrial RNA with NAD+ and NADH by yeast and human mitochondrial RNA polymerase
Source: eLife journal article supplement (doi:10.7554/elife.42179), 2018-12-10
Supplement: supp [file elife-42179-supp-v1.zip]

| Figure 2C        |                           | Sce mtRNAP   |       |       |       |       |  |
|------------------|---------------------------|--------------|-------|-------|-------|-------|--|
| [ATP] ( $\mu$ M) | [NAD <sup>+</sup> ]/[ATP] | Set 1        | Set 2 | Set 3 | Avg   | SD    |  |
| 25               | 40                        | 0.876        | 0.947 | 0.963 | 0.929 | 0.046 |  |
| 50               | 20                        | 0.828        | 0.824 | 0.859 | 0.837 | 0.019 |  |
| 100              | 10                        | 0.762        | 0.767 | 0.782 | 0.770 | 0.010 |  |
| 200              | 5                         | 0.657        | 0.650 | 0.673 | 0.660 | 0.012 |  |
| 400              | 2.5                       | 0.468        | 0.469 | 0.507 | 0.481 | 0.022 |  |
| 800              | 1.25                      | 0.299        | 0.316 | 0.345 | 0.320 | 0.023 |  |
| 1600             | 0.625                     | 0.181        | 0.176 | 0.194 | 0.184 | 0.009 |  |
|                  |                           | human mtRNAP |       |       |       |       |  |
| [ATP] ( $\mu$ M) | [NAD <sup>+</sup> ]/[ATP] | Set 1        | Set 2 | Set 3 | Avg   | SD    |  |
| 25               | 40                        | 0.922        | 0.825 | 0.909 | 0.886 | 0.053 |  |
| 50               | 20                        | 0.860        | 0.757 | 0.860 | 0.826 | 0.060 |  |
| 100              | 10                        | 0.657        | 0.650 | 0.609 | 0.639 | 0.025 |  |
| 200              | 5                         | 0.531        | 0.572 | 0.503 | 0.535 | 0.035 |  |
| 400              | 2.5                       | 0.353        | 0.364 | 0.349 | 0.355 | 0.008 |  |
| 800              | 1.25                      | 0.159        | 0.187 | 0.162 | 0.169 | 0.016 |  |
| 1600             | 0.625                     | 0.087        | 0.124 | 0.094 | 0.102 | 0.020 |  |
|                  |                           | Eco RNAP     |       |       |       |       |  |
| [ATP] ( $\mu$ M) | [NAD <sup>+</sup> ]/[ATP] | Set 1        | Set 2 | Set 3 | Avg   | SD    |  |
| 3.125            | 320                       | 0.799        | 0.716 | 0.734 | 0.750 | 0.044 |  |
| 6.25             | 160                       | 0.642        | 0.623 | 0.646 | 0.637 | 0.012 |  |
| 12.5             | 80                        | 0.476        | 0.448 | 0.451 | 0.458 | 0.015 |  |
| 25               | 40                        | 0.317        | 0.339 | 0.304 | 0.320 | 0.017 |  |
| 50               | 20                        | 0.198        | 0.189 | 0.174 | 0.187 | 0.012 |  |
| 100              | 10                        | 0.099        | 0.086 | 0.086 | 0.090 | 0.008 |  |
| 200              | 5                         | 0.044        | 0.050 | 0.042 | 0.045 | 0.004 |  |
|                  |                           | Sce RNAP II  |       |       |       |       |  |
| [ATP] ( $\mu$ M) | [NAD <sup>+</sup> ]/[ATP] | Set 1        | Set 2 | Set 3 | Avg   | SD    |  |
| 12.5             | 320                       | 0.643        | 0.690 | 0.744 | 0.692 | 0.051 |  |
| 25               | 160                       | 0.414        | 0.562 | 0.589 | 0.522 | 0.094 |  |
| 50               | 80                        | 0.383        | 0.527 | 0.554 | 0.488 | 0.092 |  |
| 100              | 40                        | 0.381        | 0.350 | 0.295 | 0.342 | 0.043 |  |
| 200              | 20                        | 0.260        | 0.143 | 0.171 | 0.191 | 0.061 |  |
| 400              | 10                        | 0.107        | 0.095 | 0.104 | 0.102 | 0.006 |  |
| 800              | 5                         | 0.043        | 0.051 | 0.059 | 0.051 | 0.008 |  |

| Figure 2D        |              | Sce mtRNAP   |       |       |       |       |  |
|------------------|--------------|--------------|-------|-------|-------|-------|--|
| [ATP] ( $\mu$ M) | [NADH]/[ATP] | Set 1        | Set 2 | Set 3 | Avg   | SD    |  |
| 25               | 40           | 0.957        | 0.959 | 0.959 | 0.958 | 0.002 |  |
| 50               | 20           | 0.859        | 0.870 | 0.873 | 0.867 | 0.007 |  |
| 100              | 10           | 0.772        | 0.784 | 0.813 | 0.790 | 0.021 |  |
| 200              | 5            | 0.644        | 0.710 | 0.717 | 0.690 | 0.040 |  |
| 400              | 2.5          | 0.556        | 0.599 | 0.594 | 0.583 | 0.023 |  |
| 800              | 1.25         | 0.446        | 0.432 | 0.500 | 0.459 | 0.036 |  |
| 1600             | 0.625        | 0.306        | 0.297 | 0.327 | 0.310 | 0.016 |  |
|                  |              | human mtRNAP |       |       |       |       |  |
| [ATP] ( $\mu$ M) | [NADH]/[ATP] | Set 1        | Set 2 | Set 3 | Avg   | SD    |  |
| 25               | 40           | 0.983        | 0.967 | 0.977 | 0.976 | 0.008 |  |
| 50               | 20           | 0.929        | 0.958 | 0.939 | 0.942 | 0.015 |  |
| 100              | 10           | 0.871        | 0.911 | 0.847 | 0.876 | 0.032 |  |
| 200              | 5            | 0.769        | 0.731 | 0.716 | 0.739 | 0.027 |  |
| 400              | 2.5          | 0.590        | 0.580 | 0.517 | 0.562 | 0.040 |  |
| 800              | 1.25         | 0.387        | 0.367 | 0.332 | 0.362 | 0.028 |  |
| 1600             | 0.625        | 0.227        | 0.231 | 0.180 | 0.213 | 0.028 |  |
|                  |              | Eco RNAP     |       |       |       |       |  |
| [ATP] ( $\mu$ M) | [NADH]/[ATP] | Set 1        | Set 2 | Set 3 | Avg   | SD    |  |
| 3.125            | 320          | 0.937        | 0.922 | 0.950 | 0.936 | 0.014 |  |
| 6.25             | 160          | 0.858        | 0.831 | 0.858 | 0.849 | 0.016 |  |
| 12.5             | 80           | 0.728        | 0.752 | 0.756 | 0.745 | 0.015 |  |
| 25               | 40           | 0.565        | 0.551 | 0.588 | 0.568 | 0.019 |  |
| 50               | 20           | 0.386        | 0.383 | 0.387 | 0.385 | 0.002 |  |
| 100              | 10           | 0.214        | 0.209 | 0.225 | 0.216 | 0.009 |  |
| 200              | 5            | 0.123        | 0.112 | 0.114 | 0.116 | 0.006 |  |
|                  |              | Sce RNAP II  |       |       |       |       |  |
| [ATP] ( $\mu$ M) | [NADH]/[ATP] | Set 1        | Set 2 | Set 3 | Avg   | SD    |  |
| 12.5             | 320          | 0.949        | 0.961 | 0.927 | 0.946 | 0.017 |  |
| 25               | 160          | 0.965        | 0.923 | 0.904 | 0.931 | 0.031 |  |
| 50               | 80           | 0.948        | 0.834 | 0.819 | 0.867 | 0.071 |  |
| 100              | 40           | 0.687        | 0.635 | 0.702 | 0.675 | 0.035 |  |
| 200              | 20           | 0.487        | 0.483 | 0.519 | 0.497 | 0.019 |  |
| 400              | 10           | 0.218        | 0.242 | 0.231 | 0.231 | 0.012 |  |
| 800              | 5            | 0.127        | 0.123 | 0.126 | 0.126 | 0.002 |  |

| Figure 2-supplement 2 |                           | T7 RNAP     |       |       |       |       |  |
|-----------------------|---------------------------|-------------|-------|-------|-------|-------|--|
| [ATP] ( $\mu$ M)      | [NAD <sup>+</sup> ]/[ATP] | Set 1       | Set 2 | Set 3 | Avg   | SD    |  |
| 25                    | 40                        | 0.905       | 0.911 | 0.921 | 0.912 | 0.008 |  |
| 50                    | 20                        | 0.813       | 0.817 | 0.835 | 0.822 | 0.012 |  |
| 100                   | 10                        | 0.663       | 0.661 | 0.675 | 0.667 | 0.008 |  |
| 200                   | 5                         | 0.479       | 0.497 | 0.511 | 0.496 | 0.016 |  |
| 400                   | 2.5                       | 0.280       | 0.300 | 0.310 | 0.296 | 0.015 |  |
| 800                   | 1.25                      | 0.159       | 0.164 | 0.161 | 0.162 | 0.003 |  |
| 1600                  | 0.625                     | 0.077       | 0.081 | 0.074 | 0.077 | 0.003 |  |
|                       |                           | Sce RNAP II |       |       |       |       |  |
| [ATP] ( $\mu$ M)      | [NADH]/[ATP]              | Set 1       | Set 2 | Set 3 | Avg   | SD    |  |
| 25                    | 40                        | 0.977       | 0.972 | 0.973 | 0.974 | 0.002 |  |
| 50                    | 20                        | 0.937       | 0.930 | 0.933 | 0.933 | 0.004 |  |
| 100                   | 10                        | 0.851       | 0.832 | 0.845 | 0.843 | 0.010 |  |
| 200                   | 5                         | 0.702       | 0.685 | 0.729 | 0.705 | 0.022 |  |
| 400                   | 2.5                       | 0.529       | 0.502 | 0.518 | 0.516 | 0.013 |  |
| 800                   | 1.25                      | 0.344       | 0.329 | 0.357 | 0.343 | 0.014 |  |
| 1600                  | 0.625                     | 0.170       | 0.197 | 0.201 | 0.189 | 0.017 |  |
