# Supplementary material for: Highly efficient 5' capping of mitochondrial RNA with NAD+ and NADH by yeast and human mitochondrial RNA polymerase
Source: eLife journal article supplement (doi:10.7554/elife.42179), 2018-12-10
Supplement: supp [file elife-42179-supp-v1.zip]

| Figure 3C  |              | -1A:T |       |       |       |       | -1T:A |       |       |       |       | -1G:C |       |       |       |       | -1C:G |       |       |       |       |
|------------|--------------|-------|-------|-------|-------|-------|-------|-------|-------|-------|-------|-------|-------|-------|-------|-------|-------|-------|-------|-------|-------|
| [ATP] (mM) | [NAD+]/[ATP] | Set 1 | Set 2 | Set 3 | Avg   | SD    | Set 1 | Set 2 | Set 3 | Avg   | SD    | Set 1 | Set 2 | Set 3 | Avg   | SD    | Set 1 | Set 2 | Set 3 | Avg   | SD    |
| 25         | 40           | 0.962 | 0.947 | 0.957 | 0.955 | 0.008 | 0.935 | 0.942 | 0.941 | 0.939 | 0.004 | 0.948 | 0.930 | 0.931 | 0.936 | 0.010 | 0.873 | 0.896 | 0.895 | 0.888 | 0.013 |
| 50         | 20           | 0.906 | 0.891 | 0.894 | 0.897 | 0.008 | 0.867 | 0.821 | 0.829 | 0.839 | 0.025 | 0.889 | 0.870 | 0.843 | 0.867 | 0.023 | 0.742 | 0.786 | 0.752 | 0.760 | 0.023 |
| 100        | 10           | 0.805 | 0.734 | 0.758 | 0.766 | 0.036 | 0.673 | 0.632 | 0.654 | 0.653 | 0.020 | 0.791 | 0.683 | 0.697 | 0.724 | 0.059 | 0.562 | 0.617 | 0.552 | 0.577 | 0.035 |
| 200        | 5            | 0.691 | 0.575 | 0.567 | 0.611 | 0.069 | 0.396 | 0.448 | 0.450 | 0.431 | 0.031 | 0.656 | 0.543 | 0.544 | 0.581 | 0.065 | 0.435 | 0.440 | 0.352 | 0.409 | 0.049 |
| 400        | 2.5          | 0.472 | 0.410 | 0.379 | 0.420 | 0.048 | 0.167 | 0.224 | 0.253 | 0.215 | 0.044 | 0.465 | 0.331 | 0.335 | 0.377 | 0.076 | 0.232 | 0.259 | 0.206 | 0.233 | 0.027 |
| 800        | 1.25         | 0.342 | 0.223 | 0.202 | 0.256 | 0.075 | 0.140 | 0.126 | 0.133 | 0.133 | 0.007 | 0.309 | 0.242 | 0.219 | 0.256 | 0.047 | 0.133 | 0.158 | 0.113 | 0.134 | 0.023 |
| 1600       | 0.625        | 0.195 | 0.115 | 0.124 | 0.145 | 0.044 | 0.096 | 0.061 | 0.071 | 0.076 | 0.018 | 0.232 | 0.135 | 0.106 | 0.158 | 0.066 | 0.073 | 0.133 | 0.056 | 0.087 | 0.040 |

| Figure 3D  |              | -1*/T |       |       |       |       | -1*/A |       |       |       |       | -1*/C |       |       |       |       | -1*/G |       |       |       |       |
|------------|--------------|-------|-------|-------|-------|-------|-------|-------|-------|-------|-------|-------|-------|-------|-------|-------|-------|-------|-------|-------|-------|
| [ATP] (μM) | [NAD+]/[ATP] | Set 1 | Set 2 | Set 3 | Avg   | SD    | Set 1 | Set 2 | Set 3 | Avg   | SD    | Set 1 | Set 2 | Set 3 | Avg   | SD    | Set 1 | Set 2 | Set 3 | Avg   | SD    |
| 25         | 40           | 0.928 | 0.958 | 0.945 | 0.944 | 0.015 | 0.909 | 0.938 | 0.913 | 0.920 | 0.015 | 0.914 | 0.951 | 0.964 | 0.943 | 0.026 | 0.857 | 0.899 | 0.869 | 0.875 | 0.022 |
| 50         | 20           | 0.889 | 0.909 | 0.895 | 0.898 | 0.010 | 0.828 | 0.679 | 0.843 | 0.783 | 0.090 | 0.864 | 0.899 | 0.919 | 0.894 | 0.028 | 0.744 | 0.837 | 0.746 | 0.776 | 0.053 |
| 100        | 10           | 0.766 | 0.806 | 0.810 | 0.794 | 0.025 | 0.649 | 0.667 | 0.687 | 0.668 | 0.019 | 0.727 | 0.855 | 0.813 | 0.799 | 0.065 | 0.554 | 0.592 | 0.584 | 0.577 | 0.020 |
| 200        | 5            | 0.637 | 0.639 | 0.664 | 0.647 | 0.015 | 0.476 | 0.473 | 0.508 | 0.486 | 0.019 | 0.660 | 0.761 | 0.682 | 0.701 | 0.053 | 0.406 | 0.374 | 0.424 | 0.401 | 0.025 |
| 400        | 2.5          | 0.476 | 0.436 | 0.504 | 0.472 | 0.034 | 0.301 | 0.358 | 0.348 | 0.336 | 0.030 | 0.452 | 0.545 | 0.492 | 0.496 | 0.047 | 0.232 | 0.233 | 0.234 | 0.233 | 0.001 |
| 800        | 1.25         | 0.251 | 0.295 | 0.303 | 0.283 | 0.028 | 0.153 | 0.189 | 0.187 | 0.176 | 0.020 | 0.249 | 0.288 | 0.291 | 0.276 | 0.024 | 0.122 | 0.182 | 0.141 | 0.148 | 0.030 |
| 1600       | 0.625        | 0.164 | 0.213 | 0.184 | 0.187 | 0.025 | 0.087 | 0.117 | 0.110 | 0.105 | 0.016 | 0.162 | 0.208 | 0.192 | 0.188 | 0.023 | 0.078 | 0.061 | 0.080 | 0.073 | 0.011 |

| Figure 3-supplement 1 |              | -1A:T |       |       |       |       | -1T:A |       |       |       |       | -1G:C |       |       |       |       | -1C:G |       |       |       |       |
|-----------------------|--------------|-------|-------|-------|-------|-------|-------|-------|-------|-------|-------|-------|-------|-------|-------|-------|-------|-------|-------|-------|-------|
| [ATP] (μM)            | [NAD+]/[ATP] | Set 1 | Set 2 | Set 3 | Avg   | SD    | Set 1 | Set 2 | Set 3 | Avg   | SD    | Set 1 | Set 2 | Set 3 | Avg   | SD    | Set 1 | Set 2 | Set 3 | Avg   | SD    |
| 25                    | 40           | 0.903 | 0.922 | 0.902 | 0.909 | 0.011 | 0.869 | 0.890 | 0.852 | 0.870 | 0.019 | 0.897 | 0.932 | 0.924 | 0.917 | 0.018 | 0.852 | 0.866 | 0.860 | 0.859 | 0.007 |
| 50                    | 20           | 0.810 | 0.822 | 0.814 | 0.815 | 0.006 | 0.767 | 0.797 | 0.751 | 0.772 | 0.023 | 0.849 | 0.868 | 0.859 | 0.859 | 0.009 | 0.713 | 0.772 | 0.697 | 0.727 | 0.039 |
| 100                   | 10           | 0.734 | 0.751 | 0.691 | 0.725 | 0.031 | 0.620 | 0.642 | 0.613 | 0.625 | 0.015 | 0.729 | 0.766 | 0.746 | 0.747 | 0.018 | 0.608 | 0.609 | 0.524 | 0.580 | 0.049 |
| 200                   | 5            | 0.646 | 0.642 | 0.619 | 0.636 | 0.015 | 0.503 | 0.531 | 0.429 | 0.488 | 0.053 | 0.603 | 0.635 | 0.624 | 0.621 | 0.016 | 0.492 | 0.531 | 0.441 | 0.488 | 0.045 |
| 400                   | 2.5          | 0.460 | 0.445 | 0.420 | 0.442 | 0.020 | 0.314 | 0.336 | 0.311 | 0.320 | 0.013 | 0.419 | 0.446 | 0.484 | 0.450 | 0.033 | 0.337 | 0.335 | 0.282 | 0.318 | 0.032 |
| 800                   | 1.25         | 0.314 | 0.250 | 0.238 | 0.267 | 0.041 | 0.178 | 0.183 | 0.161 | 0.174 | 0.012 | 0.268 | 0.281 | 0.284 | 0.278 | 0.009 | 0.241 | 0.160 | 0.138 | 0.180 | 0.054 |
| 1600                  | 0.625        | 0.270 | 0.154 | 0.157 | 0.194 | 0.066 | 0.116 | 0.073 | 0.106 | 0.099 | 0.022 | 0.169 | 0.147 | 0.178 | 0.165 | 0.016 | 0.165 | 0.094 | 0.076 | 0.112 | 0.047 |

| Figure 3E |  | mtRNAP |       | <i>E. coli</i> RNAP |       | T7 RNAP |       |
|-----------|--|--------|-------|---------------------|-------|---------|-------|
| -1        |  | Avg    | SD    | Avg                 | SD    | Avg     | SD    |
| A:T       |  | 0.300  | 0.009 | 0.095               | 0.005 | 0.323   | 0.029 |
| G:C       |  | 0.277  | 0.006 | 0.106               | 0.003 | 0.319   | 0.013 |
| T:A       |  | 0.175  | 0.004 | 0.046               | 0.001 | 0.180   | 0.010 |
| C:G       |  | 0.134  | 0.003 | 0.014               | 0.001 | 0.173   | 0.019 |
