# Supplementary material for: Highly efficient 5' capping of mitochondrial RNA with NAD+ and NADH by yeast and human mitochondrial RNA polymerase
Source: eLife journal article supplement (doi:10.7554/elife.42179), 2018-12-10

Figure 1 – Source data

C – *Saccharomyces cerevisiae* mtRNAP

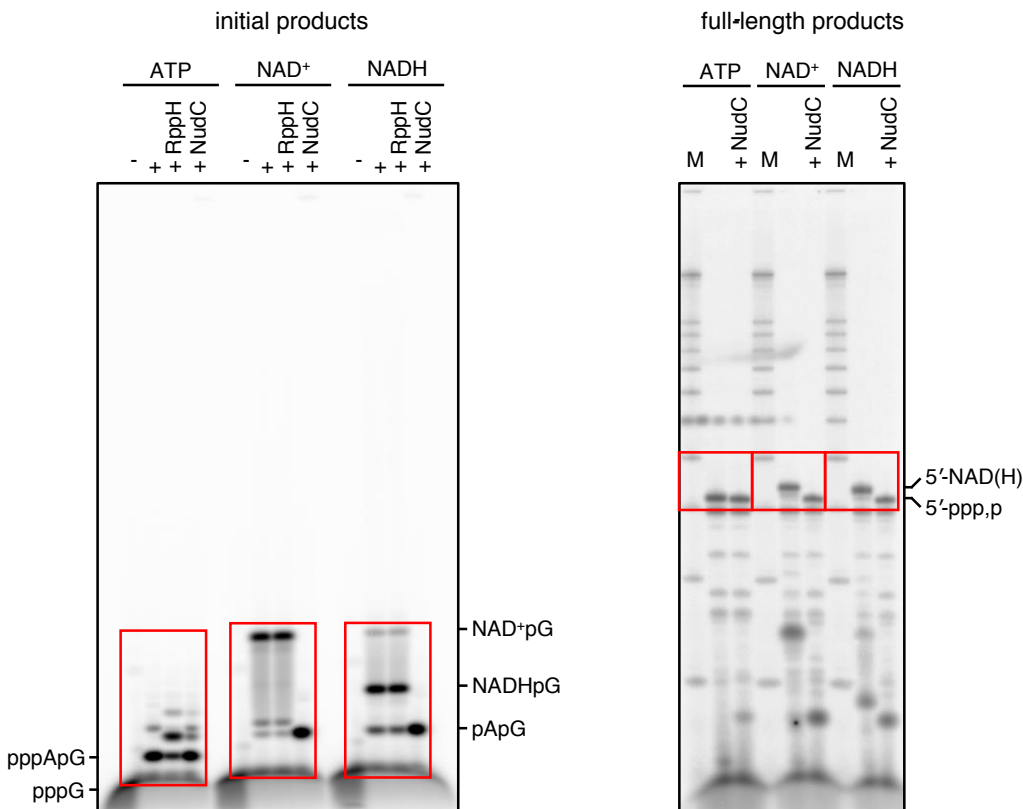

D – human mtRNAP

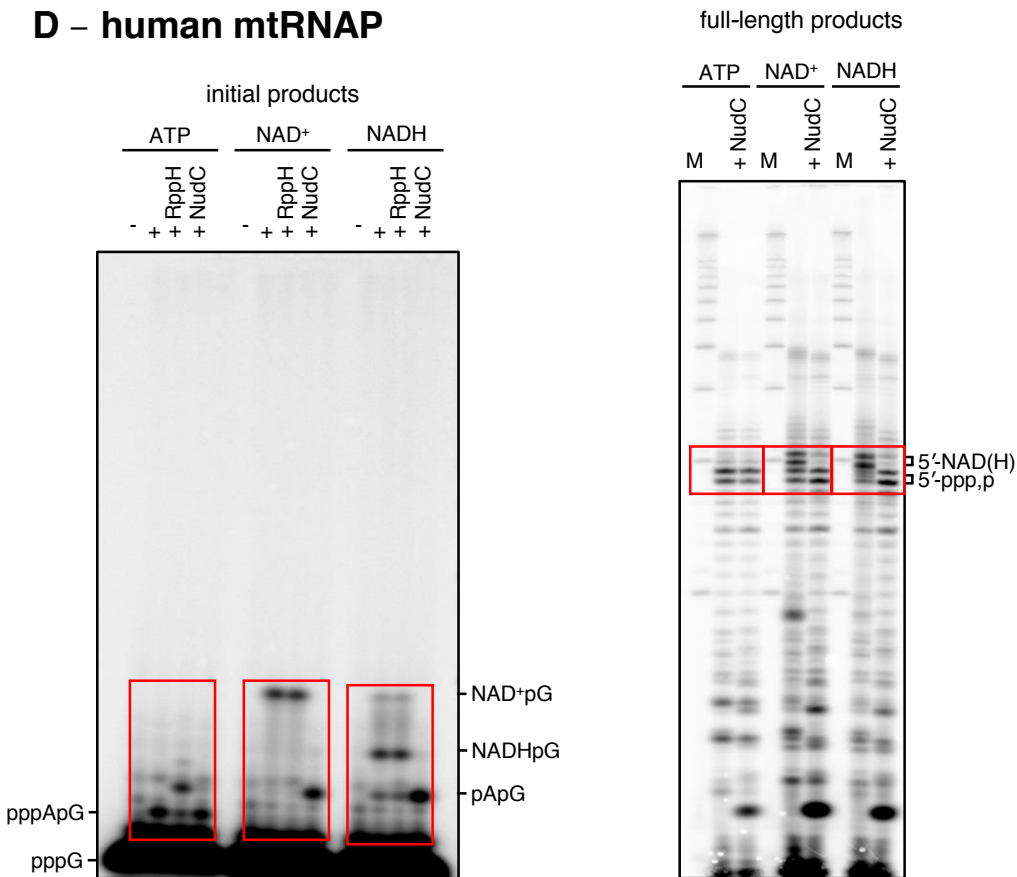

Supplement: supp [file elife-42179-supp-v1.zip]
