# Supplementary material for: Highly efficient 5' capping of mitochondrial RNA with NAD+ and NADH by yeast and human mitochondrial RNA polymerase
Source: eLife journal article supplement (doi:10.7554/elife.42179), 2018-12-10

**A**

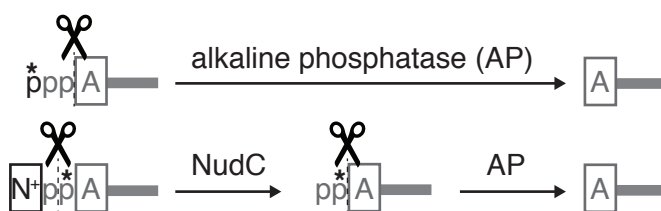

**B**

***Saccharomyces cerevisiae* mtRNAP**

p21S  $\rightarrow$  +31  
TATTATTATTATTATATATATAAGTAGTAAAAAGTAGAATAATAGATTGAAATACC  
ATAATAATAATAATATATATATTCATCATTTTTCATCTTATTATCTAACTTTATGG

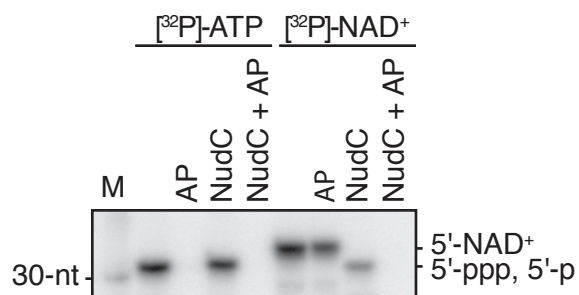

**C**

**human mtRNAP**

LSP  $\rightarrow$  +17/18  
GTGTTAGTTGGGGGTGACTGTTAAAAAGTCATACCGCCAAAGATAAAATTTGAAATCTG  
CACAAATCAACCCCCACTGACAATTTTCACGTATGGCGGTTTCTATTTTAACTTTAGAC

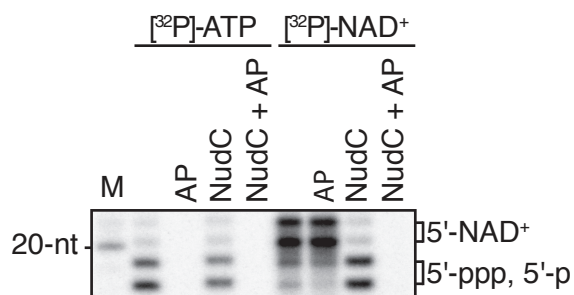

Supplement: supp [file elife-42179-supp-v1.zip]
