# Supplementary material for: Highly efficient 5' capping of mitochondrial RNA with NAD+ and NADH by yeast and human mitochondrial RNA polymerase
Source: eLife journal article supplement (doi:10.7554/elife.42179), 2018-12-10
Supplement: supp [file elife-42179-supp-v1.zip]

| Figure 2A         |              | 21S   |       |       |       |       |       |       |       |       |       | 15S   |       |       |       |       |       |       |       |       |       |
|-------------------|--------------|-------|-------|-------|-------|-------|-------|-------|-------|-------|-------|-------|-------|-------|-------|-------|-------|-------|-------|-------|-------|
|                   |              | NAD+  |       |       |       |       | NADH  |       |       |       |       | NAD+  |       |       |       |       | NADH  |       |       |       |       |
| [NCIN] ( $\mu$ M) | [NCIN]/[ATP] | Set 1 | Set 2 | Set 3 | Avg   | SD    | Set 1 | Set 2 | Set 3 | Avg   | SD    | Set 1 | Set 2 | Set 3 | Avg   | SD    | Set 1 | Set 2 | Set 3 | Avg   | SD    |
| 50                | 0.25         | 0.086 | 0.116 | 0.081 | 0.094 | 0.016 | 0.085 | 0.096 | 0.080 | 0.087 | 0.008 | 0.051 | 0.047 | 0.049 | 0.049 | 0.002 | 0.036 | 0.050 | 0.006 | 0.031 | 0.022 |
| 100               | 0.5          | 0.170 | 0.147 | 0.152 | 0.156 | 0.010 | 0.170 | 0.160 | 0.147 | 0.159 | 0.011 | 0.130 | 0.108 | 0.108 | 0.115 | 0.013 | 0.074 | 0.083 | 0.056 | 0.071 | 0.014 |
| 200               | 1            | 0.271 | 0.270 | 0.268 | 0.270 | 0.001 | 0.303 | 0.271 | 0.266 | 0.280 | 0.020 | 0.288 | 0.278 | 0.238 | 0.268 | 0.026 | 0.161 | 0.205 | 0.150 | 0.172 | 0.029 |
| 400               | 2            | 0.415 | 0.391 | 0.410 | 0.406 | 0.011 | 0.559 | 0.446 | 0.448 | 0.484 | 0.065 | 0.481 | 0.480 | 0.430 | 0.464 | 0.029 | 0.358 | 0.339 | 0.305 | 0.334 | 0.027 |
| 800               | 4            | 0.575 | 0.571 | 0.575 | 0.574 | 0.002 | 0.536 | 0.625 | 0.629 | 0.597 | 0.053 | 0.679 | 0.676 | 0.675 | 0.677 | 0.002 | 0.600 | 0.526 | 0.568 | 0.565 | 0.037 |
| 1600              | 8            | 0.702 | 0.704 | 0.696 | 0.701 | 0.003 | 0.768 | 0.773 | 0.763 | 0.768 | 0.005 | 0.819 | 0.806 | 0.809 | 0.811 | 0.007 | 0.731 | 0.704 | 0.711 | 0.715 | 0.014 |
| 3200              | 16           | 0.777 | 0.790 | 0.785 | 0.784 | 0.005 | 0.882 | 0.873 | 0.878 | 0.878 | 0.005 | 0.887 | 0.882 | 0.881 | 0.883 | 0.004 | 0.853 | 0.804 | 0.837 | 0.831 | 0.025 |
| 6400              | 32           | 0.804 | 0.807 | 0.805 | 0.806 | 0.002 | 0.938 | 0.926 | 0.934 | 0.933 | 0.006 |       |       |       |       |       | 0.925 | 0.892 | 0.924 | 0.914 | 0.019 |

| Figure 2B         |              | LSP   |       |       |       |       |       |       |       |       |       | HSP1  |       |       |       |       |       |       |       |       |       |
|-------------------|--------------|-------|-------|-------|-------|-------|-------|-------|-------|-------|-------|-------|-------|-------|-------|-------|-------|-------|-------|-------|-------|
|                   |              | NAD+  |       |       |       |       | NADH  |       |       |       |       | NAD+  |       |       |       |       | NADH  |       |       |       |       |
| [NCIN] ( $\mu$ M) | [NCIN]/[ATP] | Set 1 | Set 2 | Set 3 | Avg   | SD    | Set 1 | Set 2 | Set 3 | Avg   | SD    | Set 1 | Set 2 | Set 3 | Avg   | SD    | Set 1 | Set 2 | Set 3 | Avg   | SD    |
| 50                | 0.25         | 0.045 | 0.066 | 0.074 | 0.062 | 0.015 | 0.035 | 0.033 | 0.035 | 0.034 | 0.001 | 0.043 | 0.028 | 0.039 | 0.037 | 0.008 | 0.093 | 0.152 | 0.074 | 0.106 | 0.041 |
| 100               | 0.5          | 0.117 | 0.131 | 0.132 | 0.127 | 0.009 | 0.090 | 0.095 | 0.090 | 0.092 | 0.003 | 0.077 | 0.071 | 0.072 | 0.073 | 0.003 | 0.166 | 0.183 | 0.195 | 0.182 | 0.014 |
| 200               | 1            | 0.216 | 0.278 | 0.245 | 0.246 | 0.031 | 0.235 | 0.225 | 0.226 | 0.229 | 0.006 | 0.154 | 0.139 | 0.157 | 0.150 | 0.009 | 0.313 | 0.341 | 0.367 | 0.341 | 0.027 |
| 400               | 2            | 0.361 | 0.357 | 0.394 | 0.371 | 0.021 | 0.436 | 0.439 | 0.436 | 0.437 | 0.002 | 0.267 | 0.261 | 0.261 | 0.263 | 0.003 | 0.500 | 0.544 | 0.543 | 0.529 | 0.025 |
| 800               | 4            | 0.524 | 0.541 | 0.548 | 0.538 | 0.012 | 0.649 | 0.644 | 0.630 | 0.641 | 0.010 | 0.436 | 0.399 | 0.394 | 0.409 | 0.023 | 0.726 | 0.767 | 0.741 | 0.745 | 0.021 |
| 1600              | 8            | 0.658 | 0.616 | 0.698 | 0.657 | 0.041 | 0.782 | 0.780 | 0.774 | 0.779 | 0.004 | 0.562 | 0.521 | 0.545 | 0.543 | 0.021 | 0.795 | 0.856 | 0.850 | 0.834 | 0.034 |
| 3200              | 16           |       |       |       |       |       | 0.844 | 0.841 | 0.831 | 0.839 | 0.007 |       |       |       |       |       | 0.874 | 0.895 | 0.906 | 0.891 | 0.017 |
| 6400              | 32           |       |       |       |       |       | 0.844 | 0.837 | 0.838 | 0.840 | 0.004 |       |       |       |       |       | 0.879 | 0.919 | 0.939 | 0.912 | 0.030 |
