# Supplementary material for: Highly efficient 5' capping of mitochondrial RNA with NAD+ and NADH by yeast and human mitochondrial RNA polymerase
Source: eLife journal article supplement (doi:10.7554/elife.42179), 2018-12-10
Supplement: supp [file elife-42179-supp-v1.zip]

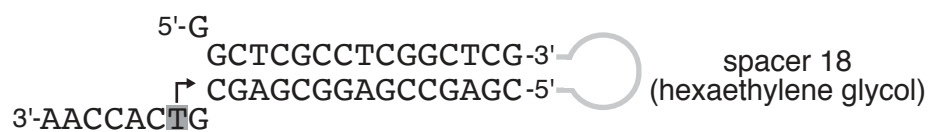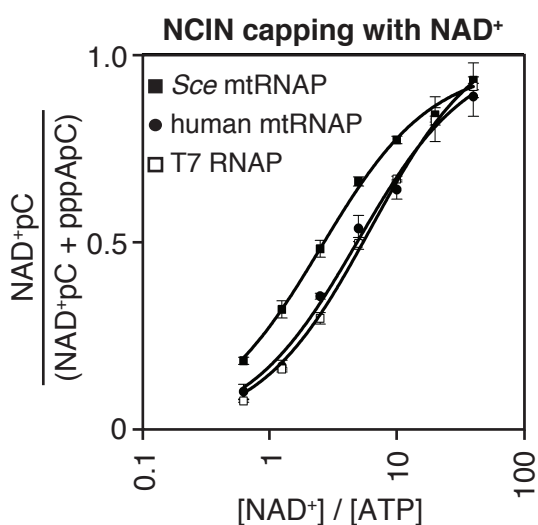

| RNAP              | $(k_{\text{cat}}/K_M)_{\text{NAD}^+} / (k_{\text{cat}}/K_M)_{\text{ATP}}$ |
|-------------------|---------------------------------------------------------------------------|
| <i>Sce</i> mtRNAP | $0.37 \pm 0.03$                                                           |
| human mtRNAP      | $0.20 \pm 0.02$                                                           |
| T7 RNAP           | $0.18 \pm 0.01$                                                           |

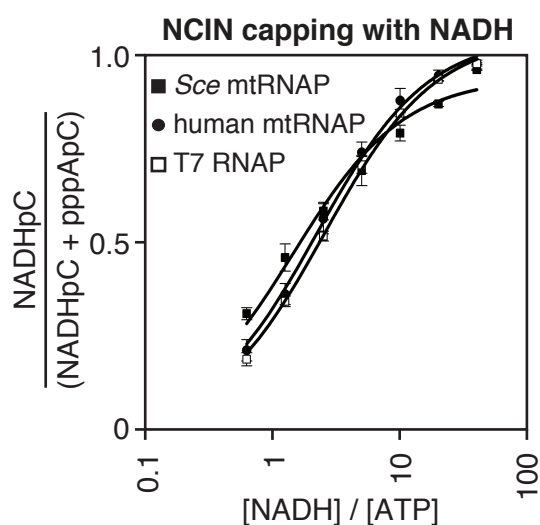

| RNAP              | $(k_{\text{cat}}/K_M)_{\text{NADH}} / (k_{\text{cat}}/K_M)_{\text{ATP}}$ |
|-------------------|--------------------------------------------------------------------------|
| <i>Sce</i> mtRNAP | $0.61 \pm 0.07$                                                          |
| human mtRNAP      | $0.50 \pm 0.06$                                                          |
| T7 RNAP           | $0.43 \pm 0.02$                                                          |
