# Supplementary material for: Highly efficient 5' capping of mitochondrial RNA with NAD+ and NADH by yeast and human mitochondrial RNA polymerase
Source: eLife journal article supplement (doi:10.7554/elife.42179), 2018-12-10
Supplement: supp [file elife-42179-supp-v1.zip]

| COX2 (aerobic respiration) |      |      |       | COX2 (anaerobic fermentation) |      |      |       |
|----------------------------|------|------|-------|-------------------------------|------|------|-------|
| Replicate                  | %ppp | %NAD | %NADH | Replicate                     | %ppp | %NAD | %NADH |
| 1                          | 44.5 | 48.0 | 0.1   | 1                             | 32.6 | 27.1 | 40.3  |
| 2                          | 48.9 | 42.9 | 0.1   | 2                             | 32.9 | 23.2 | 43.9  |
| 3                          | 39.4 | 52.5 | 0.1   | 3                             | 37.3 | 18.9 | 43.8  |
| Avg                        | 44.2 | 47.8 | 0.1   | Avg                           | 34.3 | 23.1 | 42.7  |
| SD                         | 4.7  | 4.8  | 0.0   | SD                            | 2.6  | 4.1  | 2.1   |

| 21S (aerobic respiration) |      |      |       | 21S (anaerobic fermentation) |      |      |       |
|---------------------------|------|------|-------|------------------------------|------|------|-------|
| Replicate                 | %ppp | %NAD | %NADH | Replicate                    | %ppp | %NAD | %NADH |
| 1                         | 78.3 | 21.7 | n/a   | 1                            | 59.9 | 15.2 | 24.9  |
| 2                         | 65.8 | 34.2 | n/a   | 2                            | 71.6 | 8.3  | 20.1  |
| 3                         | 71.8 | 28.2 | n/a   | 3                            | 68.6 | 12.1 | 19.2  |
| Avg                       | 72.0 | 28.0 |       | Avg                          | 66.7 | 11.9 | 21.4  |
| SD                        | 6.2  | 6.2  |       | SD                           | 6.1  | 3.4  | 3.1   |

| 7S RNA (HEK293T cells) |      |      |       |
|------------------------|------|------|-------|
| Replicate              | %ppp | %NAD | %NADH |
| 1                      | 80.2 | 19.8 | n/a   |
| 2                      | 84.0 | 16.0 | n/a   |
| 3                      | 83.3 | 16.7 | n/a   |
| Avg                    | 82.5 | 17.5 |       |
| SD                     | 2.0  | 2.0  |       |
