# Supplementary material for: Highly efficient 5' capping of mitochondrial RNA with NAD+ and NADH by yeast and human mitochondrial RNA polymerase
Source: eLife journal article supplement (doi:10.7554/elife.42179), 2018-12-10
Supplement: supp [file elife-42179-supp-v1.zip]

**A**

**bacteriophage T7 RNAP**

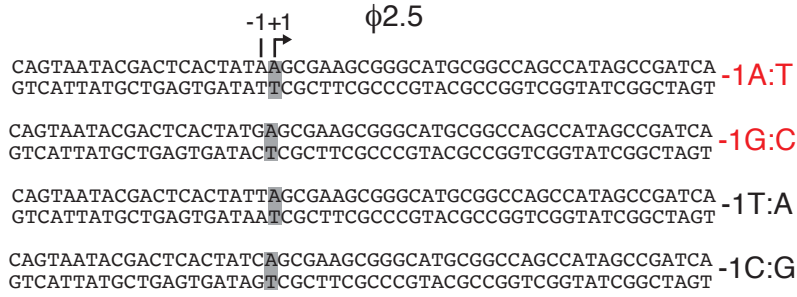

**B**

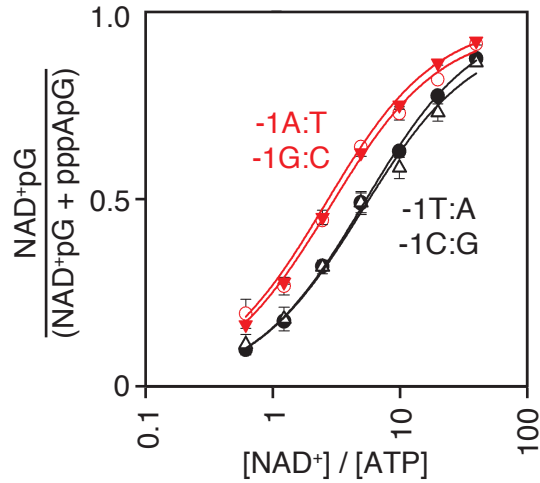

| promoter | $(k_{\text{cat}}/K_{\text{M}})_{\text{NAD}^+} / (k_{\text{cat}}/K_{\text{M}})_{\text{ATP}}$ |
|----------|---------------------------------------------------------------------------------------------|
| -1A:T    | $0.32 \pm 0.03$                                                                             |
| -1G:C    | $0.32 \pm 0.01$                                                                             |
| -1T:A    | $0.18 \pm 0.01$                                                                             |
| -1C:G    | $0.17 \pm 0.01$                                                                             |
