# Supplementary material for: Highly efficient 5' capping of mitochondrial RNA with NAD+ and NADH by yeast and human mitochondrial RNA polymerase
Source: eLife journal article supplement (doi:10.7554/elife.42179), 2018-12-10

Figure 4 – Source data

*S. cerevisiae* COX2 RNA *in vitro* controls

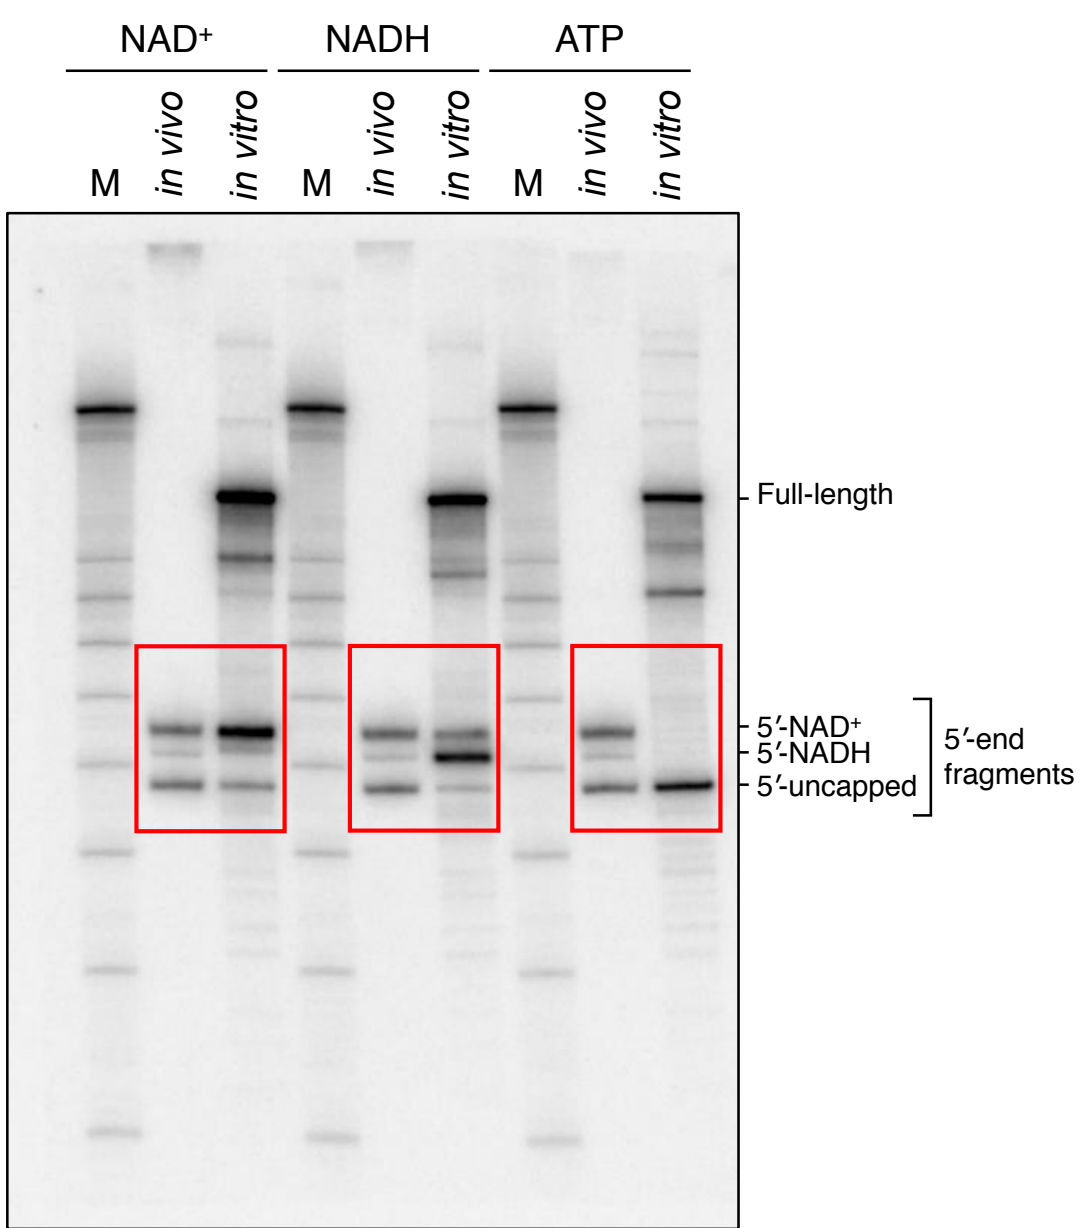

Supplement: supp [file elife-42179-supp-v1.zip]
